# Supplementary material
Source: MDPI journal article supplement (https://www.mdpi.com/search?q=nanomaterials-09-00988)
Supplement: s001 [file nanomaterials-09-00988-s001.pdf]

*Supplementary Materials*

# Controlled Preparation of Nanoparticle Gradient Materials by Diffusion

Andreas Spinnrock <sup>1</sup>, Max Martens <sup>2</sup>, Florian Enders <sup>1</sup>, Klaus Boldt <sup>1</sup> and Helmut Cölfen <sup>1,\*</sup>

## Supplementary Figures

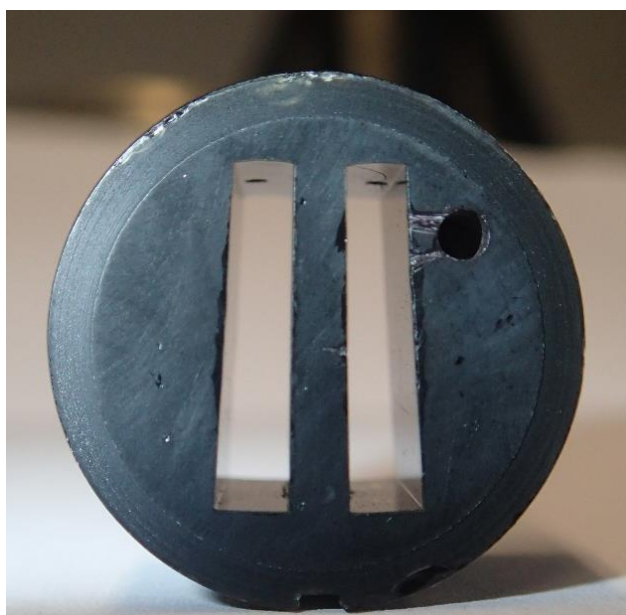

**Figure S1.** Photograph of a band-forming centerpiece with reference sector (left), sample sector (right) and reservoir.

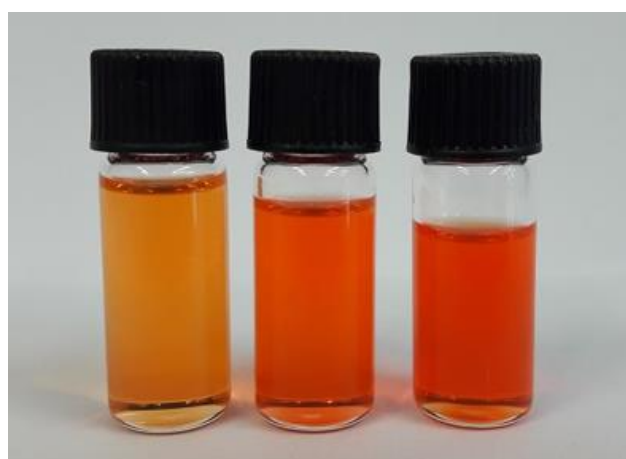

**Figure S2.** Photograph of CdSe nanoparticle dispersions. From left to right: small nanoparticles ( $d = 2.8$  nm), medium-sized nanoparticles ( $d = 3.2$  nm) and large nanoparticles ( $d = 3.8$  nm).



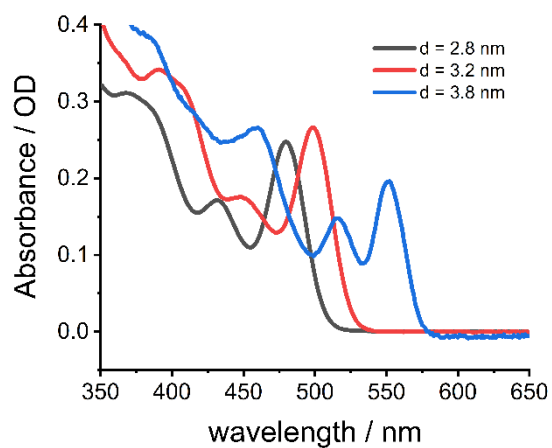

**Figure S3.** UV/Vis absorbance spectra of spherical CdSe nanoparticles with different diameters in toluene.

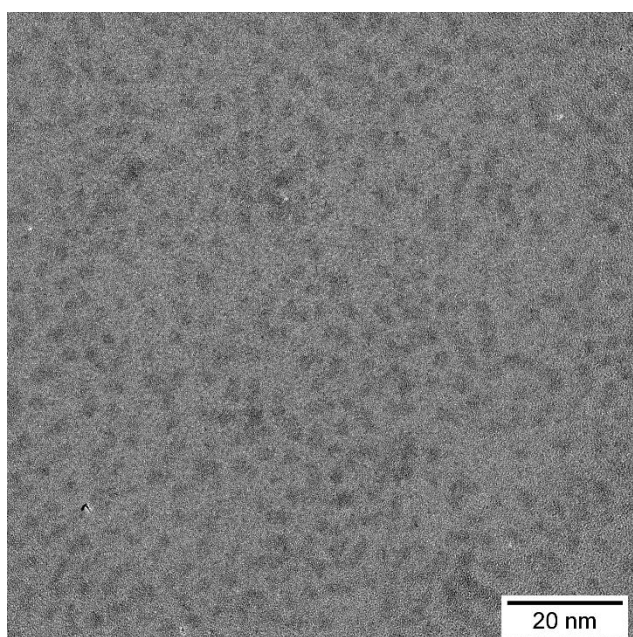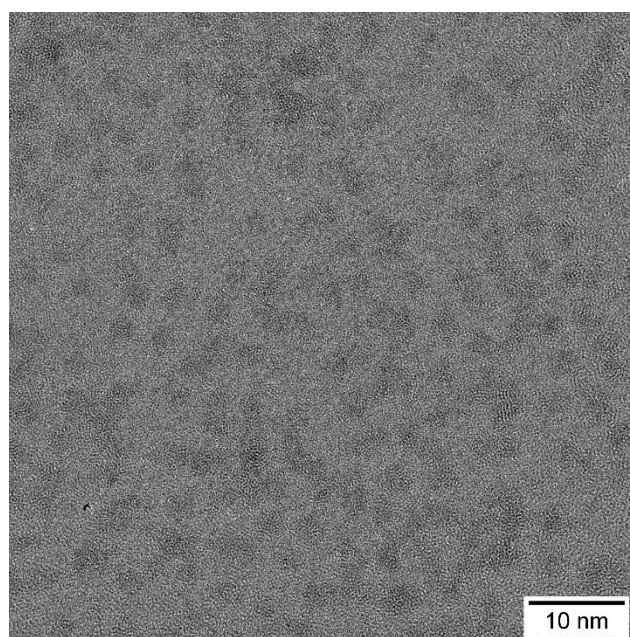

**Figure S4.** HR-TEM-Images of small spherical CdSe nanoparticles with a diameter of 2.8 nm.

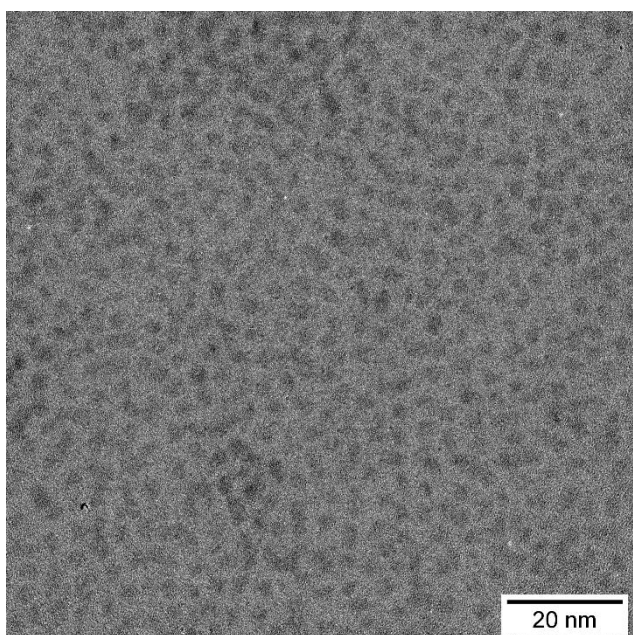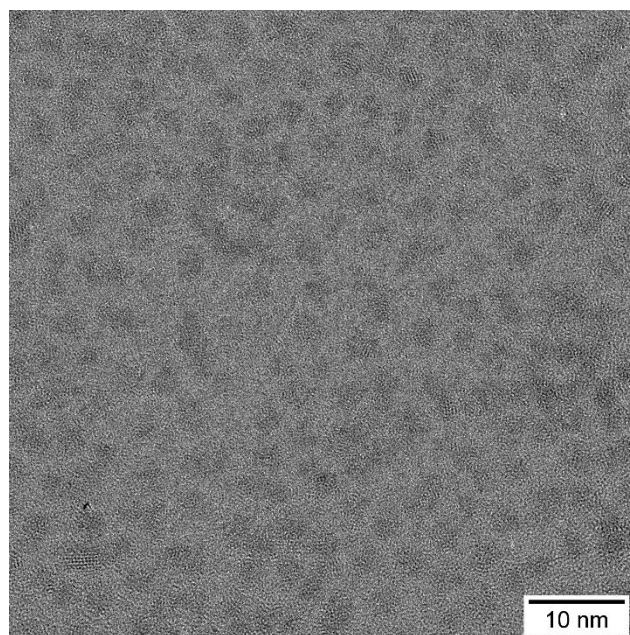

**Figure S5.** HR-TEM-Images of medium-sized spherical CdSe nanoparticles with a diameter of 3.2 nm.



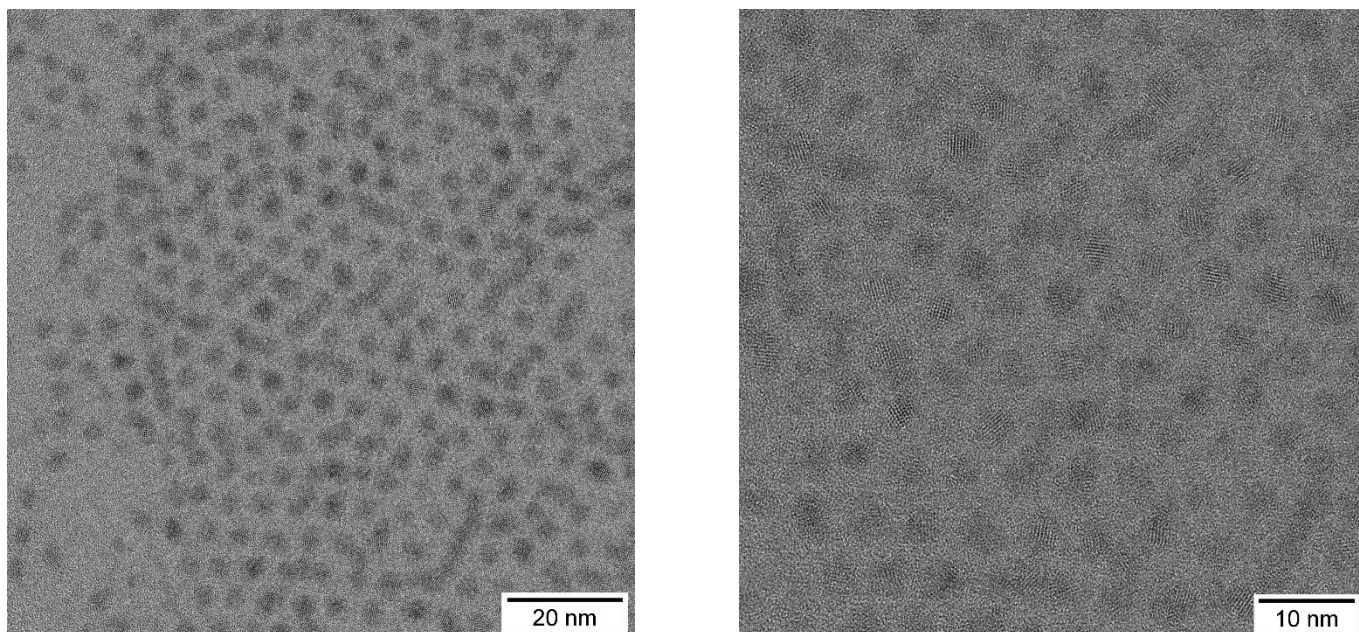

**Figure S6.** HR-TEM-Images of large spherical CdSe nanoparticles with a diameter of 3.8 nm.

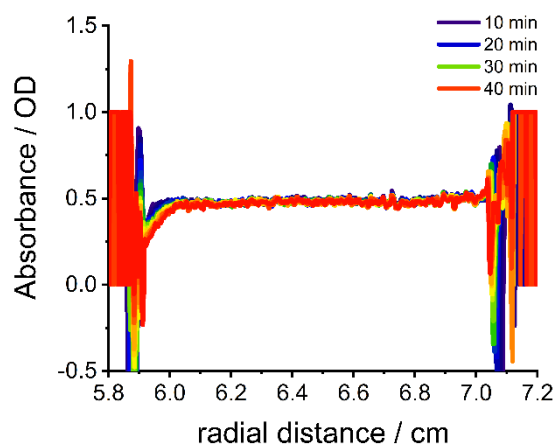

**Figure S7.** Absorbance profile of gelatin with large ( $d = 3.8$  nm,  $\lambda = 546$  nm) CdSe nanoparticles against radial distance from axis of rotation at different times in a sedimentation velocity experiment at 40 000 rpm (129 000 RCF(max)).

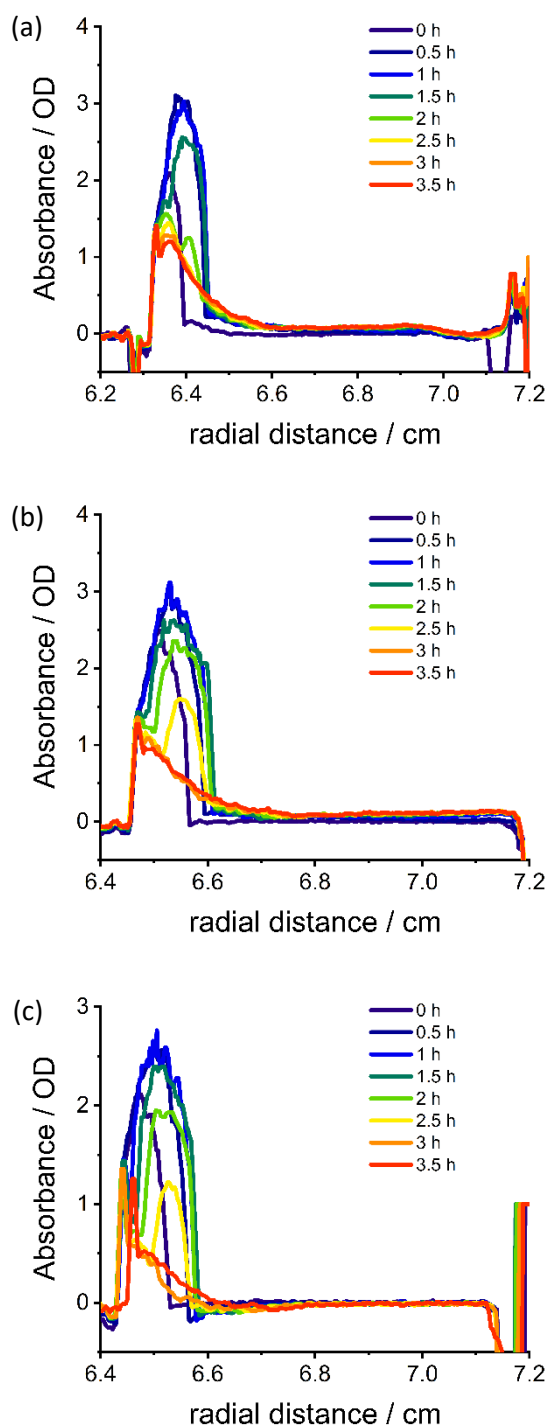

**Figure S8.** Absorbance profiles of gelatin with small (a) ( $d = 2.8$  nm,  $\lambda = 482$  nm), medium-sized (b) ( $d = 3.2$  nm,  $\lambda = 500$  nm) and large (c) ( $d = 3.8$  nm,  $\lambda = 500$  nm) CdSe nanoparticles against radial distance from axis of rotation at different times after overlaying at early times at  $36$  °C. Black band phenomena are observed.

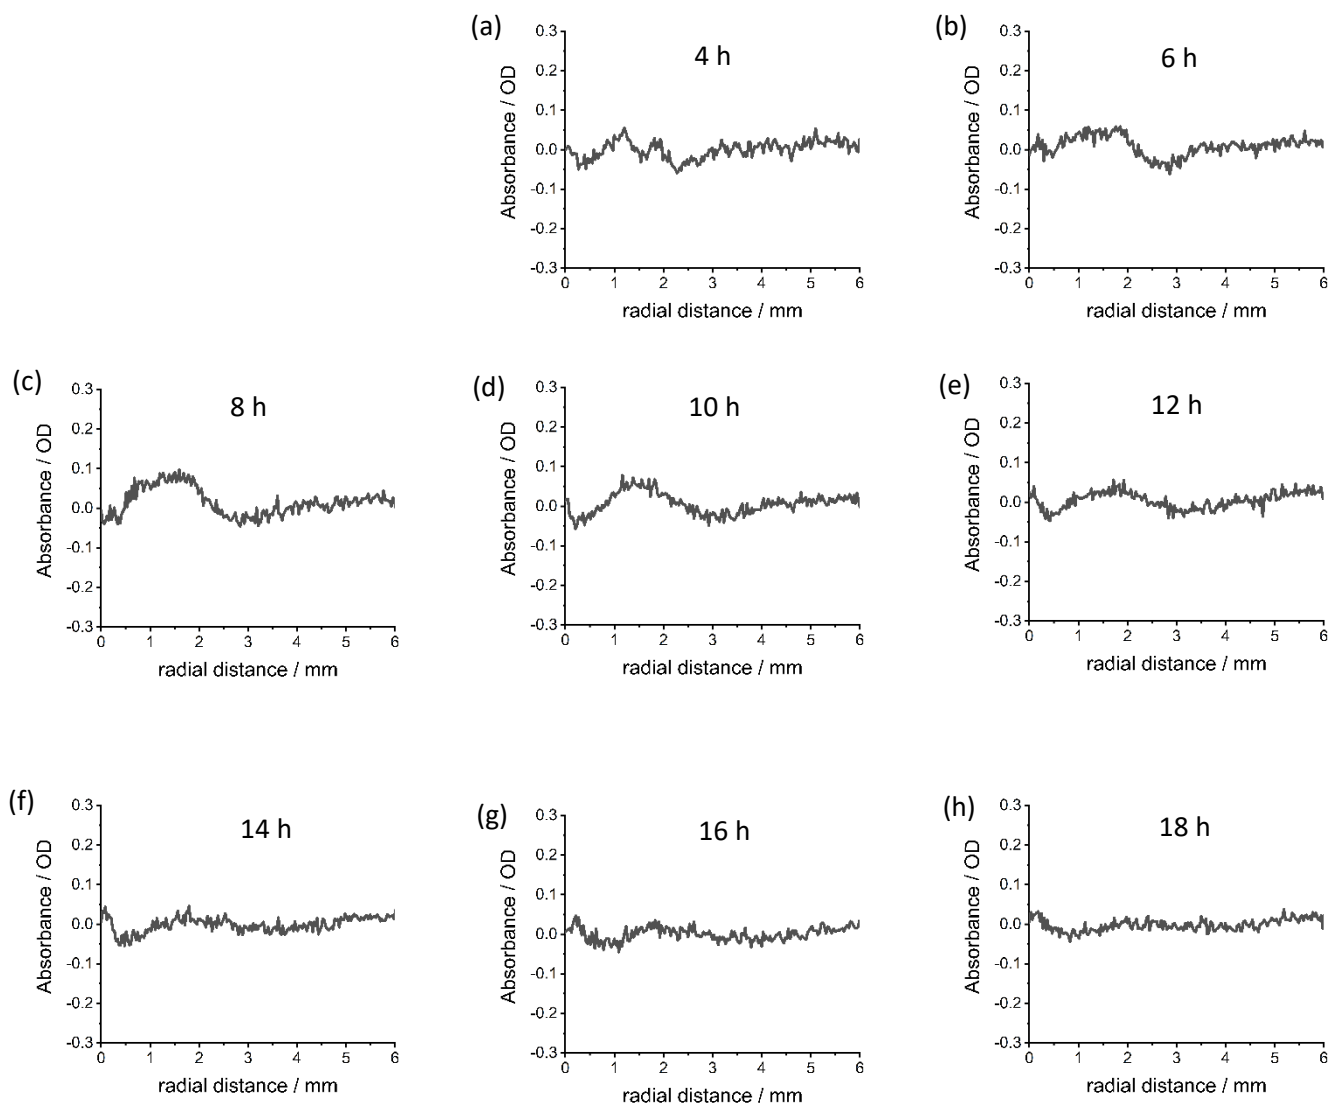

**Figure S9.** Absorbance residuals between simulation and experimental detection for gelatin with large ( $d = 3.8$  nm) CdSe nanoparticles after (a) 4 h, (b) 6 h, (c) 8 h, (d) 10 h, (e) 12 h, (f) 14 h, (g) 16 h and (h) 18 h at  $\lambda = 500$  nm at  $36$  °C. Radial distance is distance from the top of the polymer melt.

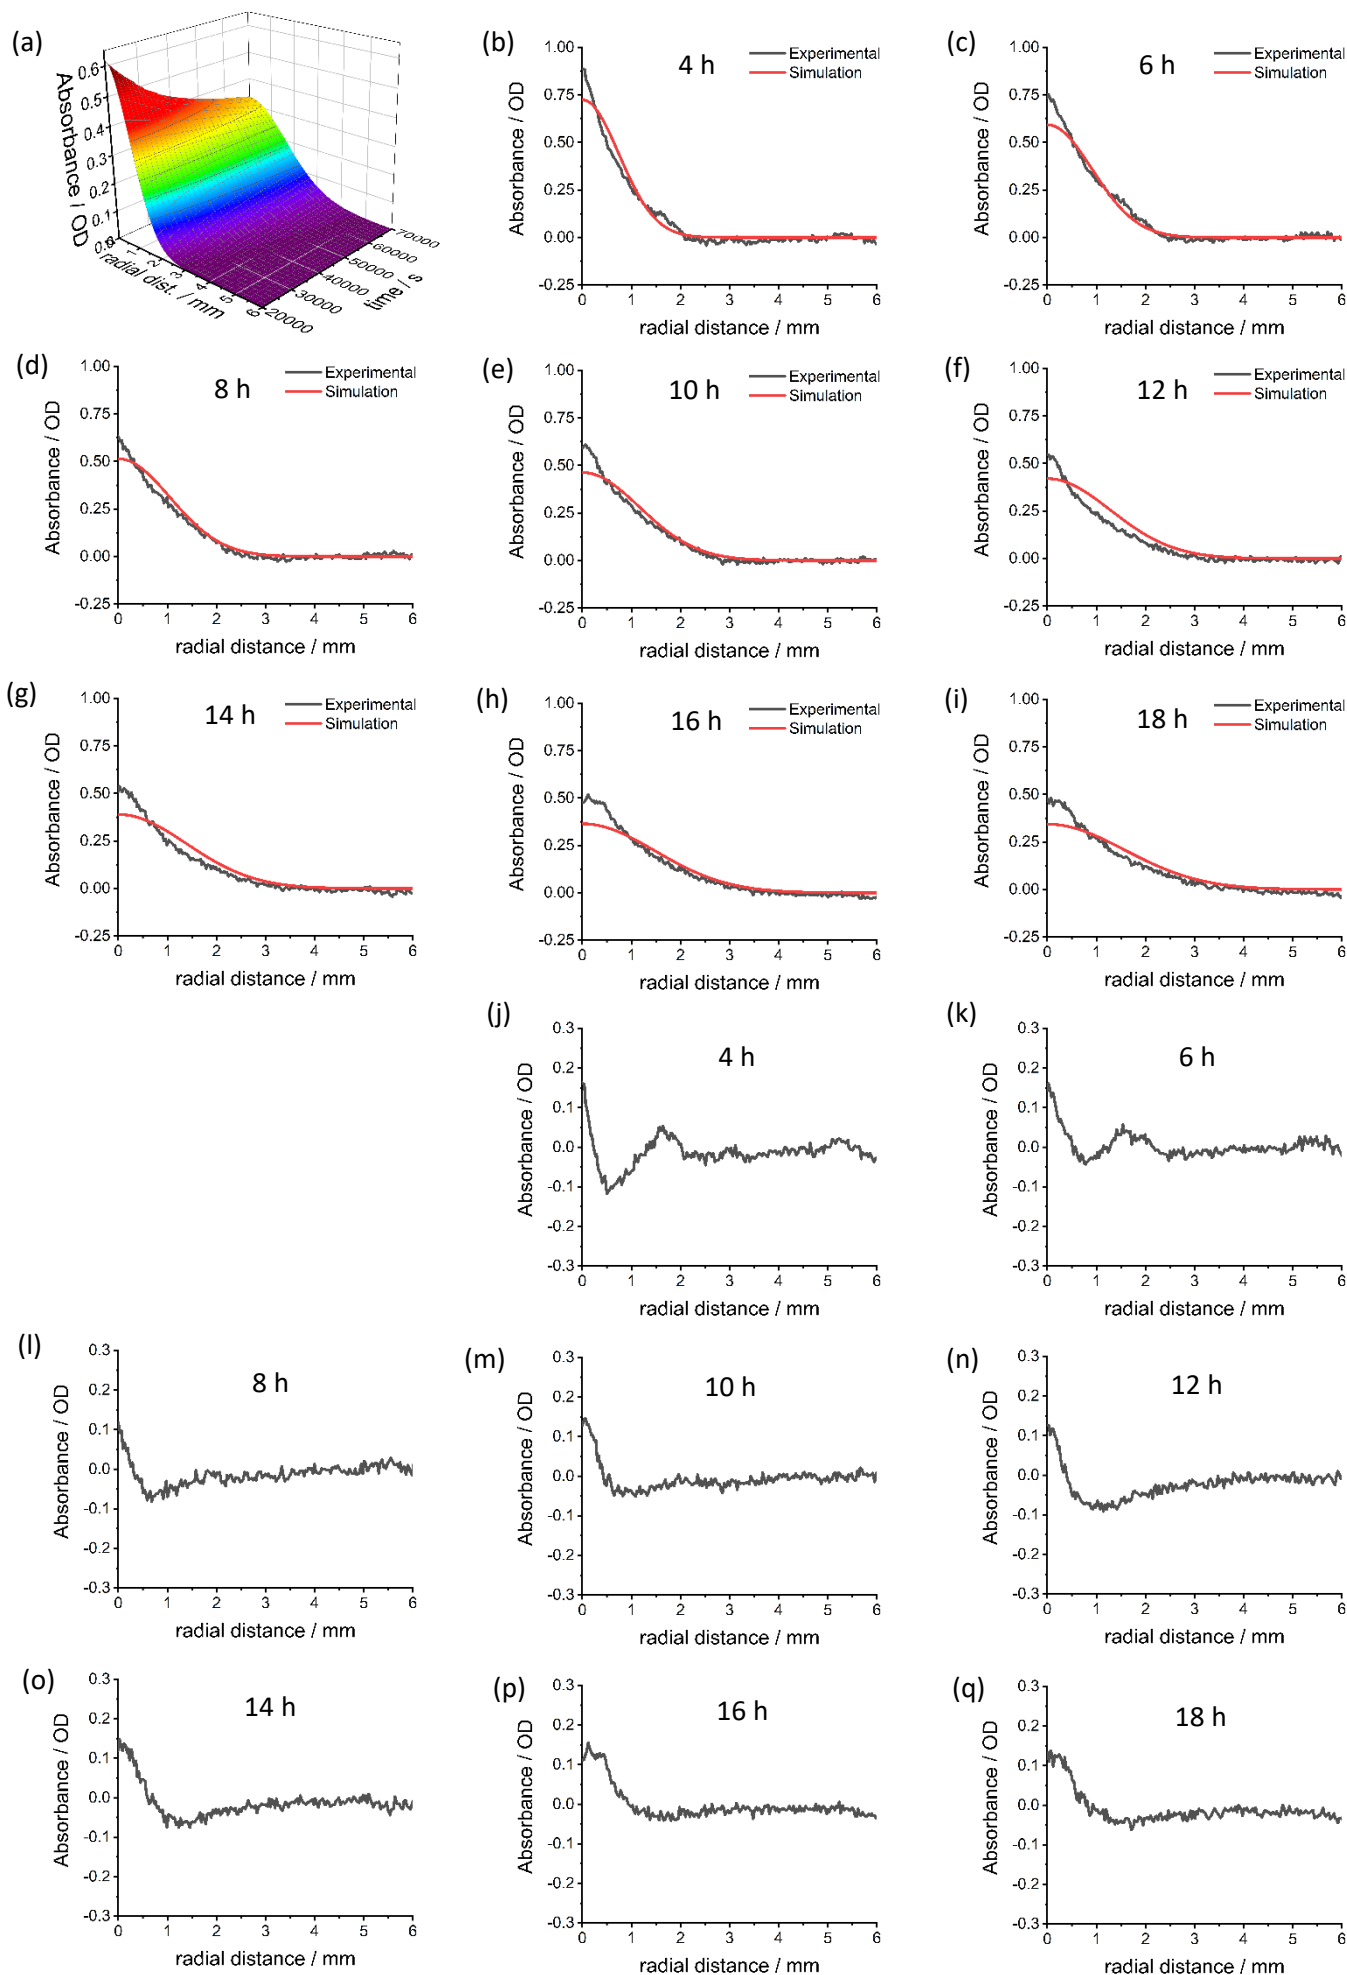

**Figure S10.** (a) Simulated absorbance profile after overlaying of small CdSe nanoparticles ( $d = 2.8$  nm) over time; Comparison of simulated and experimental absorbance profiles after overlaying of small CdSe nanoparticles ( $d = 2.8$  nm) after (b) 4 h, (c) 6 h, (d) 8 h, (e) 10 h, (f) 12 h, (g) 14 h, (h) 16 h and (i) 18 h at  $\lambda = 482$  nm at  $36^\circ\text{C}$ . Absorbance residuals between simulation and experimental detection for gelatin with small ( $d = 2.8$  nm) CdSe nanoparticles after (j) 4 h, (k) 6 h, (l) 8 h, (m) 10 h, (n) 12 h, (o) 14 h, (p) 16 h and (q) 18 h at  $\lambda = 482$  nm at  $36^\circ\text{C}$ .

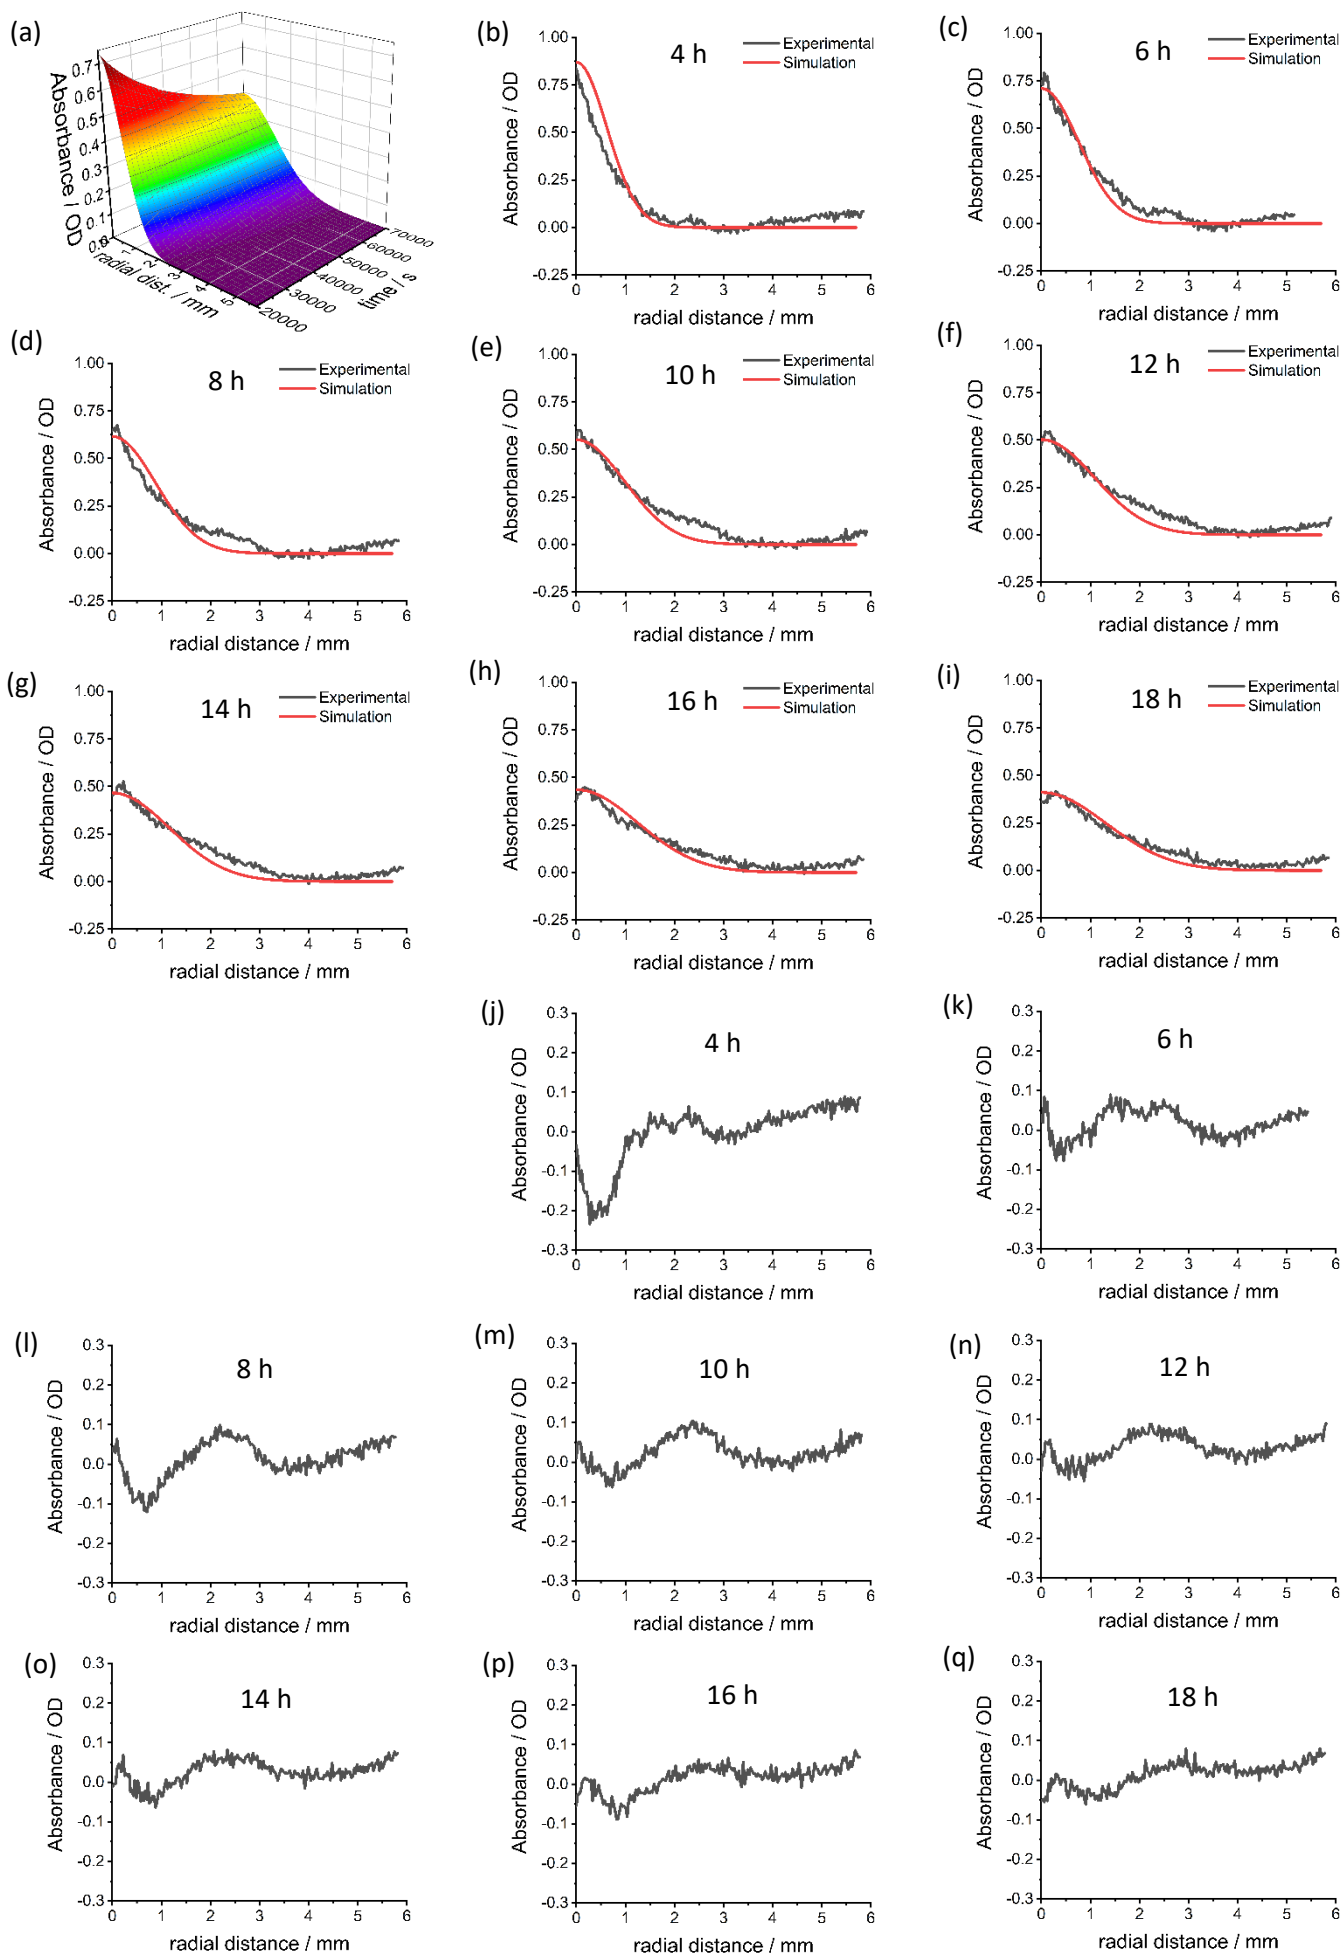

**Figure S11.** (a) Simulated absorbance profile after overlaying of medium-sized CdSe nanoparticles ( $d = 3.2$  nm) over time; Comparison of simulated and experimental absorbance profiles after overlaying of medium-sized CdSe nanoparticles ( $d = 3.2$  nm) after (b) 4 h, (c) 6 h, (d) 8 h, (e) 10 h, (f) 12 h, (g) 14 h, (h) 16 h and (i) 18 h at  $\lambda = 500$  nm at  $36$  °C. Absorbance residuals between simulation and experimental detection for gelatin with small ( $d = 2.8$  nm) CdSe nanoparticles after (j) 4 h, (k) 6 h, (l) 8 h, (m) 10 h, (n) 12 h, (o) 14 h, (p) 16 h and (q) 18 h at  $\lambda = 500$  nm at  $36$  °C. Radial distance is distance from the top of the polymer melt.



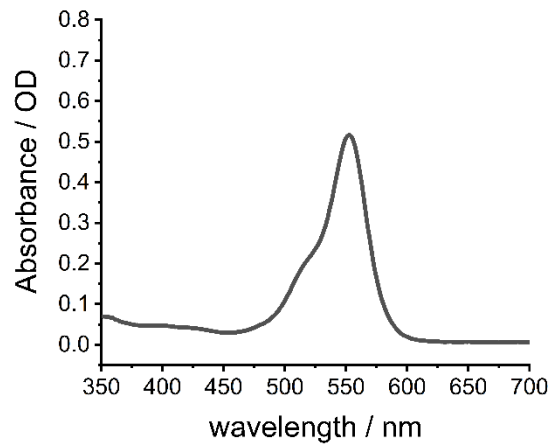

**Figure S12.** UV/Vis absorbance spectra of RITC-SiNPs ( $d = 25$  nm) in water.

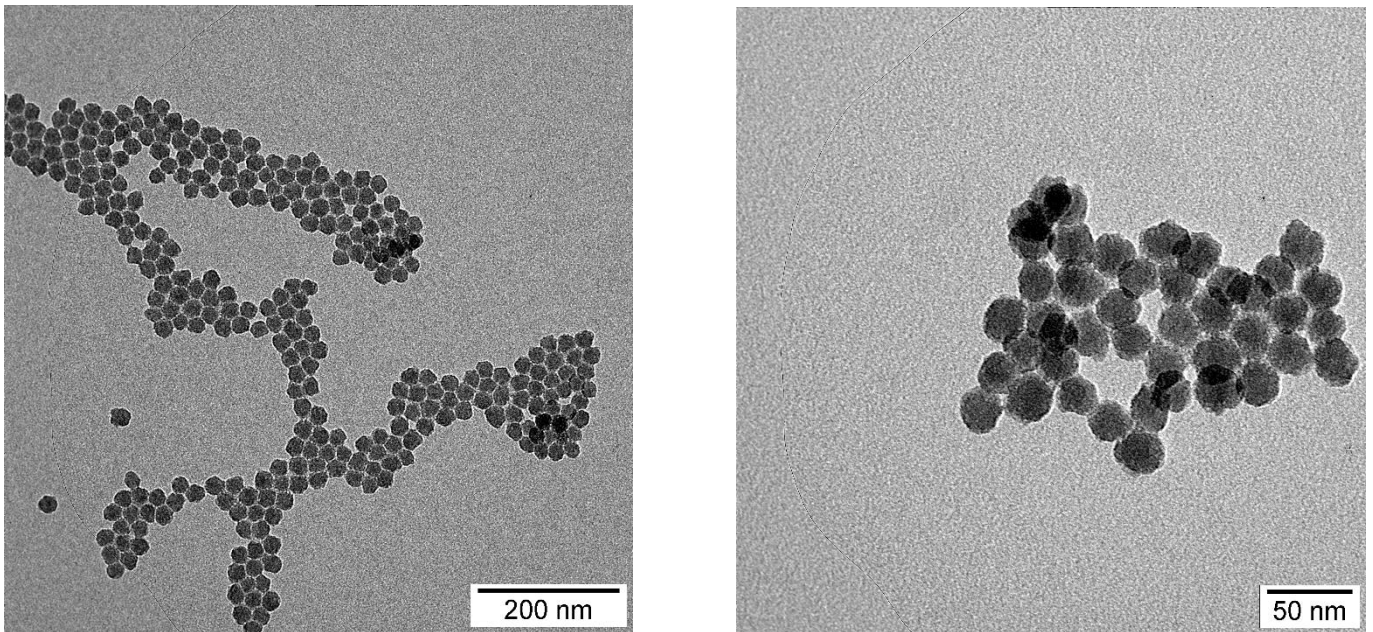

**Figure S13.** TEM-Images of spherical Rhodamine B isothiocyanate-incorporated silicananoparticles (RITC-SiNPs) with a diameter of 25 nm.

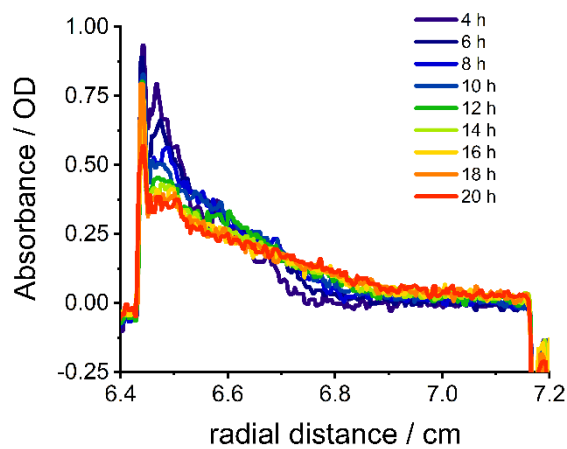

**Figure S14.** Absorbance profile of gelatin with RITC-SiNPs against radial distance from axis of rotation at different times after overlaying at  $\lambda = 550$  nm at 40 °C.



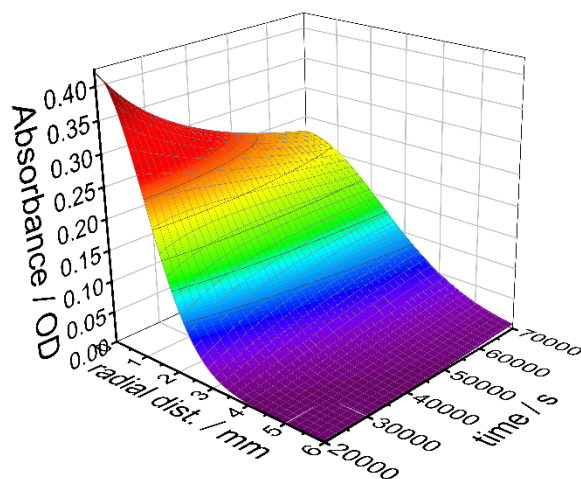

**Figure S15.** Simulated absorbance profile after overlaying of small RITC-SiNPs ( $d = 25$  nm) over time. Radial distance is distance from the top of the polymer melt.

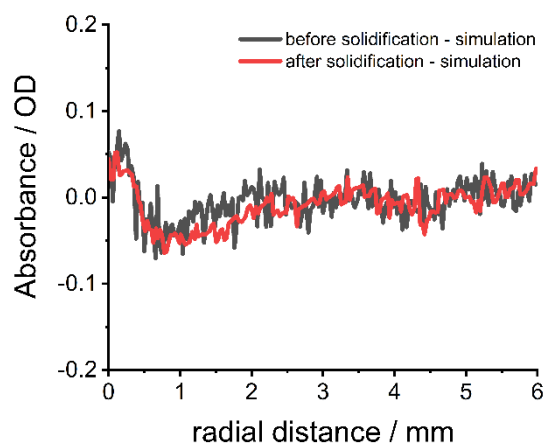

**Figure S16.** Absorbance residuals between simulation and experimental detection for nanoparticle gradient material with RITC-SiNPs ( $d = 25$  nm) before and after solidification at  $\lambda = 550$  nm. Radial distance is distance from the top of the polymer melt.

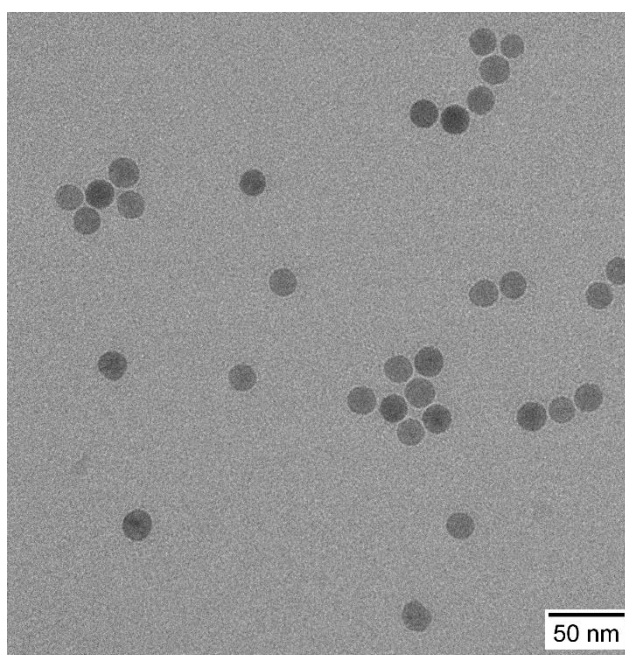

**Figure S17.** TEM-Images of spherical superparamagnetic iron oxide nanoparticles (SPIONs) with a diameter of 19 nm.
